# Supplementary material for: Phytoplankton detection study through hyperspectral signals in Patagonian Fjords
Source: Copernicus journal article supplement (doi:10.5194/egusphere-2024-3951), 2025-01-09
Supplement: Supplementary file 1 [file egusphere-2024-3951-supplement.pdf]

## Supplementary Materials

**Table S1: Phytoplankton community characterisation.**

| Sampling Location | Date       | Season | Station | Total R* | Diatoms R | Flagellates R | Diversity | Dominance |
|-------------------|------------|--------|---------|----------|-----------|---------------|-----------|-----------|
| Ilque             | 05/01/2023 | Summer | I-1     | 12       | 9         | 3             | 0.127     | 0.977     |
|                   |            |        | I-2     | 11       | 8         | 3             | 0.118     | 0.982     |
| Pulelo            | 18/01/2023 | Summer | P-1     | 22       | 17        | 5             | 0.572     | 0.762     |
|                   |            |        | P-2     | 24       | 18        | 6             | 0.495     | 0.816     |
|                   |            |        | P-3     | 20       | 14        | 6             | 0.557     | 0.740     |
|                   |            |        | P-4     | 21       | 16        | 5             | 0.551     | 0.768     |
| Isla Tenglo       | 26/01/2023 | Summer | T-1     | 21       | 15        | 6             | 0.535     | 0.804     |
|                   |            |        | T-2     | 18       | 13        | 5             | 0.592     | 0.775     |
|                   |            |        | T-3     | 20       | 14        | 6             | 0.496     | 0.832     |
| Pulelo            | 08/03/2023 | Autumn | P-5     | 19       | 16        | 3             | 1.236     | 0.465     |
|                   |            |        | P-6     | 25       | 18        | 7             | 1.115     | 0.584     |
|                   |            |        | P-7     | 22       | 17        | 5             | 1.229     | 0.459     |
|                   |            |        | P-8     | 22       | 18        | 4             | 0.931     | 0.646     |
| Ilque             | 31/03/2023 | Autumn | I3      | 14       | 11        | 3             | 0.637     | 0.784     |
| Yaotal            | 12/04/2023 | Autumn | Y1      | 10       | 6         | 4             | 0.974     | 0.627     |
| Chaparano         | 14/04/2023 | Autumn | C-1     | 27       | 18        | 9             | 1.253     | 0.466     |
|                   |            |        | C-2     | 30       | 22        | 8             | 1.069     | 0.581     |
|                   |            |        | C-3     | 26       | 19        | 7             | 0.863     | 0.670     |
| Canal Tenglo      | 09/05/2023 | Autumn | CT-1    | 16       | 12        | 4             | 0.317     | 0.914     |
|                   |            |        | CT-2    | 16       | 11        | 5             | 0.339     | 0.901     |

\*R: richness
